# Supplementary material
Source: Springer Nature journal article supplement (https://www.springermedizin.de/resource/supplementary/12955_2012_1099_MOESM1_ESM.pdf/9559280)

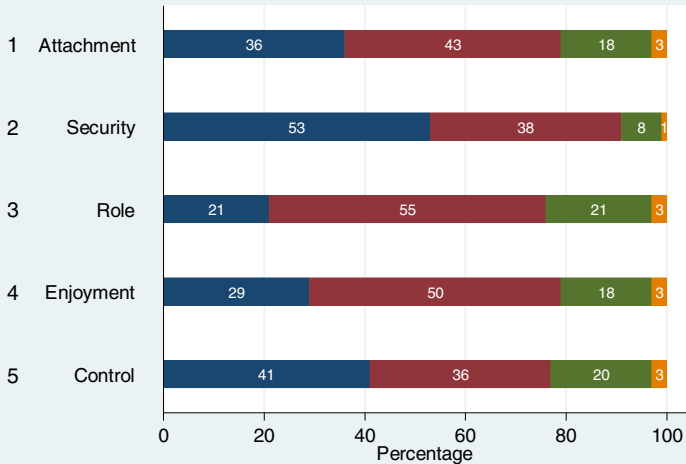

4 (Full capability) 3 (A lot) 2 (A little) 1 (No capability)

Supplement: MOESM1 [file 9559280]
